# Supplementary material for: Multimodal scene recognition using semantic segmentation and deep learning integration
Source: PeerJ journal article supplement (doi:10.7717/peerj-cs.2858), 2025-05-14

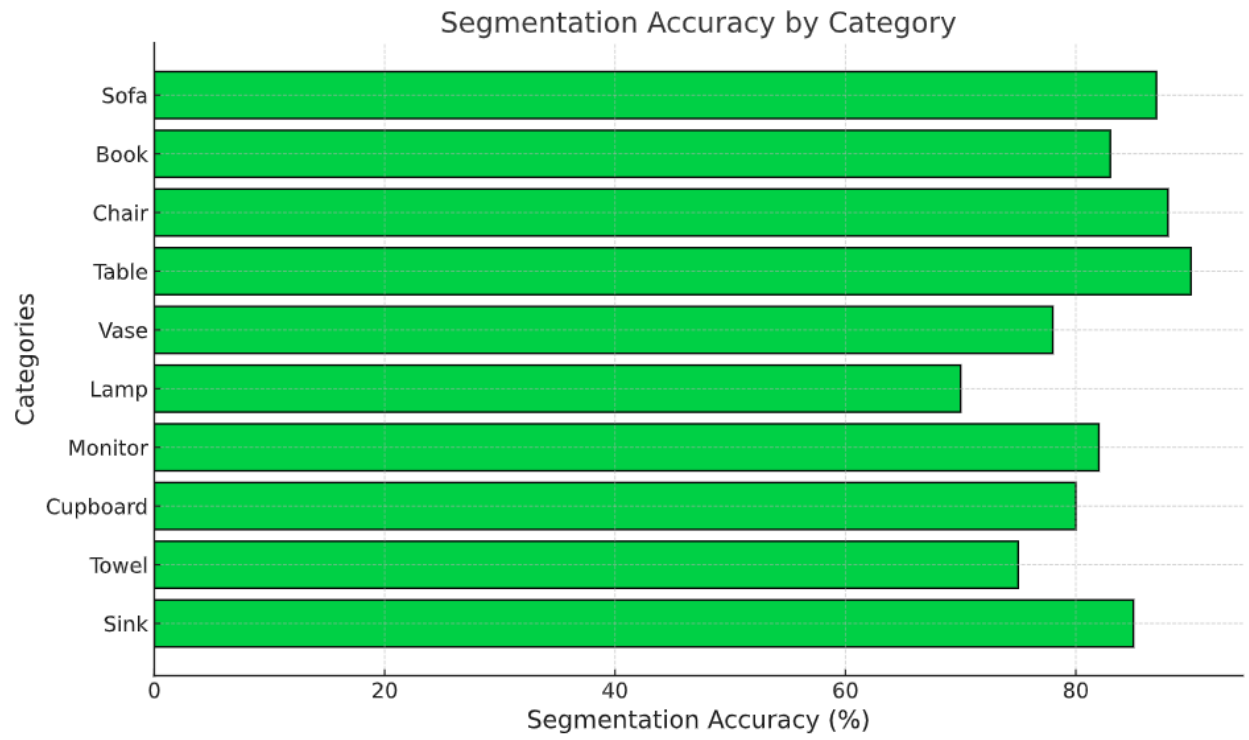

Supplement: Figure_d.pdf [file Figure_d.pdf]
