# Supplementary material for: Multimodal scene recognition using semantic segmentation and deep learning integration
Source: PeerJ journal article supplement (doi:10.7717/peerj-cs.2858), 2025-05-14
Supplement: Technology_Infrastructure.pdf [file Technology_Infrastructure.pdf]

## **TECHNOLOGY INFRASTRUCTURE**

The procedure was carried out using a Windows 10 computer that had an Intel Core i7 processor clocked at 3.60 GHz, an Nvidia Tesla K80: 2496 CUDA cores, 16 GB RAM. Python 3.6 and the Keras API were used in the model's development for both training and construction.
